# Supplementary material
Source: Springer Nature journal article supplement (https://www.springermedizin.de/resource/supplementary/12992_2013_276_MOESM3_ESM.pdf/9616254)
Supplement: MOESM3 [file 9616254]

Records identified through database searching = 5413

- Medline: 2832
- Web of Science: 2581

Additional records identified through other sources: websites of international organisations

N = 15

Duplicates excluded = 343

Records screened = 5085

Records excluded = 4860

- not in Africa: 2285
- not among FSWs: 1818
- no intervention: 651
- not in English: 81
- no full text available: 25

Full-text articles assessed for eligibility = 225

Full-text articles excluded = 24

- no intervention: 19
- not among FSWs: 3
- not in English: 2

Studies describing targeted SRH interventions for FSWs = 201 (53 projects)

Studies describing SRH interventions encompassing community empowerment processes = 129 (42 projects)
